# Supplementary material for: Diabetes Mellitus Accelerates Aβ Pathology in Brain Accompanied by Enhanced GAβ Generation in Nonhuman Primates
Source: PLoS One. 2015 Feb 12;10(2):e0117362. doi: 10.1371/journal.pone.0117362 (PMC4326359; doi:10.1371/journal.pone.0117362)
Supplement: S1 Table — (XLSX) [file pone.0117362.s002.xlsx]

## Sheet: Table1
Table S1. Clinical Background of monkeys analyzed in the present study
DM-Number	Age (years)	Max BW (g)	Last BW (g)	sex	Glu (mg/dL)*	TG (mg/dL)*	Diagnosis	FL-SPs	FL-CAA	TL-SPs	TL-CAA	Other
1	17	6820	2820	female	228	387	DM	－	－	－	－	severe islet amyloidosis
2	17	5600	1910	female	209	315	DM	－	－	－	－	severe islet amyloidosis
3	18	5480	3450	female	148	914	DM	○	－	－	－	severe islet amyloidosis, fatty liver
4	18	5760	3520	female	154	766	DM	○	－	○	－	severe islet amyloidosis
5	18	6330	2160	female	755	219	DM	○	－	－	－	severe islet amyloidosis, atheromatosis
6	18	7480	4830	female	174	185	DM	－	－	○	－	severe islet amyloidosis
7	19	5460	2470	female	443	937	DM	－	－	○	－	severe islet amyloidosis
8	19	10650	4860	male	434	1584	DM	○	－	－	－	severe islet amyloidosis
9	20	4630	1920	female	341	425	DM	○	－	－	－	severe islet amyloidosis
10	24	6840	3960	female	461	112	DM	○	－	○	○	severe islet amyloidosis
11	26	6500	2890	female	233	495	DM	○	○	○	○	severe islet amyloidosis, fatty liver
12	26	5800	2560	female	283	107	DM	○	○	○	○	severe islet amyloidosis
13	27	6920	4740	female	221	2569	DM	○	－	○	○	severe islet amyloidosis
14	28	5530	2600	female	237	241	DM	○	－	○	○	severe islet amyloidosis
15	28	6750	2770	female	153	243	DM	○	－	○	－	severe islet amyloidosis
16	30	4560	2190	female	245	185	DM	○	○	○	○	severe islet amyloidosis
17	32	10580	5090	male	200	287	DM	○	○	○	○	severe islet amyloidosis
18	36	3380	2170	female	389	129	DM	○	○	○	○	severe islet amyloidosis
19	36	8750	4180	male	247	126	DM	○	○	○	○	severe islet amyloidosis
Control-Number	Age (years)	Max BW (g)	Last BW (g)	sex	Glu (mg/dL)*	TG (mg/dL)*	Anamnesis	FL-SPs	FL-CAA	TL-SPs	TL-CAA	Other
1	6	5030	4820	male	56	15	normal	－	－	－	－	Not examined
2	6	3730	3460	female	62	34	normal	－	－	－	－	Not examined
3	7	3300	2930	female	42	29	normal	－	－	－	－	Not examined
4	7	3830	3830	female	22	15	normal	－	－	－	－	Not examined
5	7	3300	2930	female	42	29	normal	－	－	－	－	Not examined
6	7	2680	2350	female	48	30	normal	－	－	－	－	Not examined
7	18	6020	4650	male	42	34	normal	－	－	－	－	Not examined
8	18	4900	4220	female	47	8	normal	－	－	－	－	normal
9	19	9170	8180	male	45	30	normal	－	－	－	－	normal
10	19	3880	3800	female	66	33	normal	－	－	－	－	Not examined
11	20	5130	4630	female	46	63	normal	－	－	－	－	Not examined
12	21	4250	3400	female	61	25	normal	－	－	－	－	normal
13	24	3660	2190	female	51	85	normal	○	－	○	－	Not examined
14	24	3920	2530	female	36	121	normal	－	－	－	－	Not examined
15	24	4500	3800	female	50	173	normal	○	－	○	－	Not examined
16	25	6700	5120	female	68	55	normal	○	－	○	－	Not examined
17	25	9650	7040	male	61	35	normal	○	－	○	－	Not examined
18	26	8230	7890	female	77	85	normal	－	－	－	－	Not examined
19	26	4180	2040	female	54	143	normal	○	－	○	－	Not examined
20	27	3740	2740	female	58	75	normal	○	－	○	－	Not examined
21	28	6160	4410	female	50	100	normal	○	－	○	○	mild islet amyloidosis
22	30	4170	2860	female	43	133	normal	○	－	○	－	Not examined
Abbreviations: BW, Body weight; CAA, cerebral amyloid angiopathy; DM, diabetes mellitus type 2; FL, frontal lobes; Glu, blood glucose levels; SPs, senile plaques; TG, blood triglyceride levels; TL, temporal lobes.
*The last value of each monkey.
